# Supplementary material for: An Improved Model of Shade-affected Stream Temperature in Soil & Water Assessment Tool
Source: Copernicus journal article supplement (doi:10.5194/hess-2022-116), 2022-08-23
Supplement: Supplementary file [file hess-2022-116-AC6-supplement.pdf]

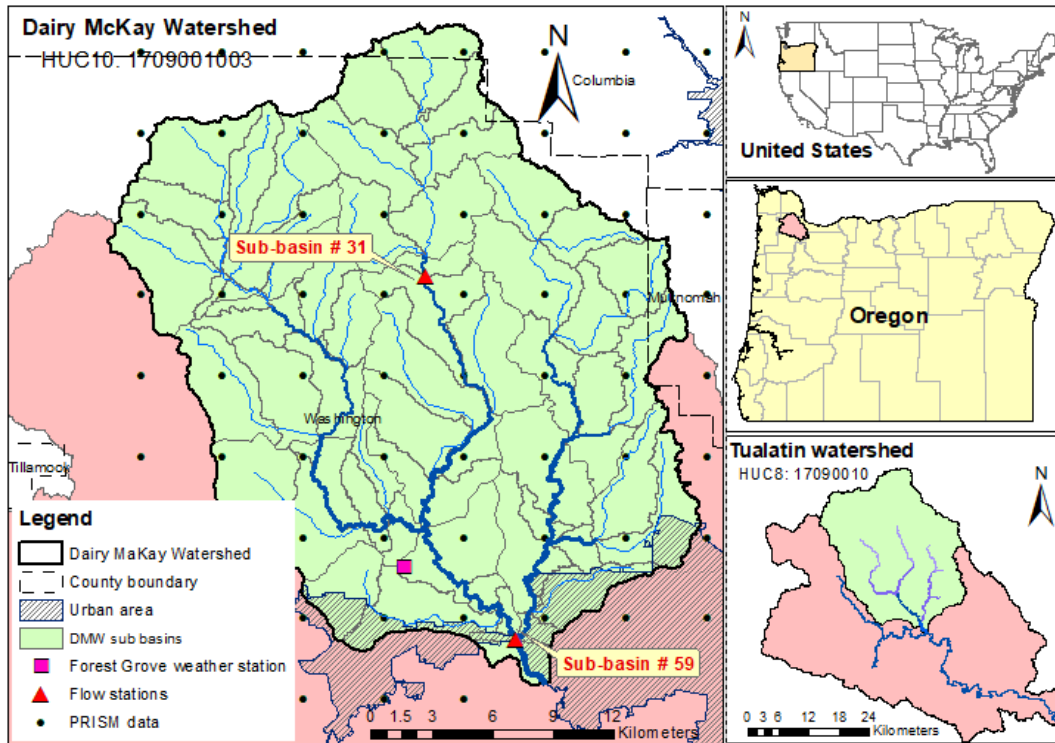

Figure 1: Left, Streams, sub-watersheds, and political boundaries of the Dairy McKay Watershed (DMW) (HUC10-1719001003). Top right, location of DMW in the Tualatin River basin, and Bottom right, location of the Tualatin River basin in North-western Oregon, USA.
